# Supplementary material for: Hand Hygiene Practices and Promotion in Public Hospitals in Western Sierra Leone: Changes Following Operational Research in 2021
Source: MDPI journal article supplement (doi:10.3390/tropicalmed8110486), 2023-10-27
Supplement: s1 [file s1]

**S1 Annex.** Interpretation of the total score and domain wise score from the WHO HHSAF tool (WHO, 2010)

| Overall Assessment of hand hygiene practice and promotion based on total score |               |                             |                                                                                                                                                                                  |
|--------------------------------------------------------------------------------|---------------|-----------------------------|----------------------------------------------------------------------------------------------------------------------------------------------------------------------------------|
| Color code                                                                     | Total Score   | Level                       | Definition                                                                                                                                                                       |
|                                                                                | 0-125         | Inadequate                  | Indicates insufficient hand hygiene practices and promotion, and requires significant improvement                                                                                |
|                                                                                | 126-250       | Basic                       | Indicates that some measures are in place but not satisfactory and therefore requires further improvement                                                                        |
|                                                                                | 251-375       | Intermediate or consolidate | Indicates appropriate hand hygiene promotion strategies and improvements in hand hygiene practices, but requires long-term planning to ensure continual improvement and progress |
|                                                                                | 376-500       | Advance or embedding        | Indicates sustained hand hygiene promotion and practice as well as a quality and safety culture surrounding hand hygiene promotion within the organization                       |
| Level of the domains                                                           |               |                             |                                                                                                                                                                                  |
| Color code                                                                     | Domain score* | Level                       |                                                                                                                                                                                  |
|                                                                                | >70           | Excellent                   |                                                                                                                                                                                  |
|                                                                                | 51-70         | Good                        |                                                                                                                                                                                  |
|                                                                                | 35-50         | Poor                        |                                                                                                                                                                                  |
|                                                                                | <35           | Very poor                   |                                                                                                                                                                                  |

WHO – world health organization, HHSAF – hand hygiene self-assessment framework, \*Cut offs used for domain wise score are author's arbitrary cut offs

**S2 Annex.** Total number of hospitals(N) with a positive response for specific indicators under the five domains of HHSAF tool in Western Area of Sierra Leone, before (May 2021) and after (March-April 2023) the implementation of the recommendations from operational research\* (WHO, 2010)-appendix 2.

| Question / Indicator                                                                                                                               | Before<br>N (%) | After<br>N(%) |
|----------------------------------------------------------------------------------------------------------------------------------------------------|-----------------|---------------|
| <b>1. System Change</b>                                                                                                                            |                 |               |
| 1.1. Are alcohol based handrub available facility-wide with continuous supply at each point of care (with efficacy and tolerability proven)?       | 6(46)           | 12(92)        |
| 1.2. Is the sink to bed ratio at least 1:10 facility-wide and 1:1 in isolation rooms and in intensive care units                                   | 4(31)           | 3(23)         |
| 1.3. Is there a continuous supply of clean, running water?                                                                                         | 8(61)           | 9(69)         |
| 1.4. Is soap available at each sink?                                                                                                               | 10(77)          | 13(100)       |
| 1.5. Are single-use towels available at each sink?                                                                                                 | 0(0)            | 0(0)          |
| 1.6. IS there a dedicated budget for continuous procurement of hand hygiene products                                                               | 0(0)            | 3(23)         |
| 1.7. Is there a realistic plan in place to improve the infrastructure in your healthcare facility?                                                 | 0(0)            | 4(31)         |
| <b>2. Training and Education</b>                                                                                                                   |                 |               |
| 2.1. Are there mandatory training for all professional categories at commencement of employment, then ongoing regular training (at least annually) | 6(46)           | 4(31)         |
| 2.2. Is a process in place to confirm that all healthcare workers complete this training?                                                          | 10(77)          | 7(54)         |
| 2.3. Is a professional with adequate skills to serve as trainer for hand hygiene educational programs active within the healthcare facility?       | 12(92)          | 13(100)       |
| 2.4. Is a system in place for training and validation of hand hygiene compliance observers?                                                        | 12(92)          | 10(77)        |

|                                                                                                                                                                   |        |        |
|-------------------------------------------------------------------------------------------------------------------------------------------------------------------|--------|--------|
| 2.5. Is there a dedicated budget that allows for hand hygiene training?                                                                                           | 1(8)   | 2(15)  |
| <b>3. Evaluation and Feedback</b>                                                                                                                                 |        |        |
| 3.1. Are regular (at least annual) ward-based audits undertaken to assess the availability of handrub, soap, single-use towels and other hand hygiene resources?  | 2(15)  | 0(0)   |
| 3.2. Is healthcare worker knowledge of the indications for hand hygiene assessed at least annually?                                                               | 11(85) | 8(62)  |
| 3.3. Is healthcare worker knowledge of the correct technique for hand hygiene assessed at least annually?                                                         | 10(77) | 8(62)  |
| 3.4. Is consumption of alcohol-based handrub monitored regularly (at least every 3 months)?                                                                       | 9(69)  | 0(0)   |
| 3.5. Is consumption of soap monitored regularly (at least every 3 months)?                                                                                        | 9(69)  | 0(0)   |
| 3.6. Is alcohol-based handrub consumption at least 20 L per 1000 patient-days?                                                                                    | 3(23)  | 0(00)  |
| 3.7. Is direct observation of hand hygiene compliance performed every 3 months or more often using the WHO hand hygiene observation tools (or similar technique)? | 11(85) | 12(92) |
| 3.8. Was the maximum (71-80%) hand hygiene compliance rate according to the WHO hand hygiene observation tool (or similar technique) in your facility?            | 0(0)   | 0(0)   |
| <b>4. Reminders in the workplace</b>                                                                                                                              |        |        |
| 4.1. Is poster explaining the indications for hand hygiene displayed in all wards/treatment areas                                                                 | 9(69)  | 4(31)  |
| 4.2. Is poster explaining the correct use of hand rub displayed in all wards/treatment areas                                                                      | 8(62)  | 2(15)  |
| 4.3. Is poster explaining correct handwashing technique displayed at every sink in all wards/treatment areas                                                      | 8(62)  | 6(46)  |
| 4.4. Is there a systematic audit of all posters for evidence of damage, with replacement as required?                                                             | 0(0)   | 4(31)  |
| 4.5. Is hand hygiene promotion undertaken by displaying and regularly updating posters other than those mentioned above?                                          | 3(23)  | 5(38)  |
| 4.6. Are hand hygiene information leaflets available in all the wards?                                                                                            | 0(0)   | 0(0)   |

|                                                                                                                                                                                                             |        |        |
|-------------------------------------------------------------------------------------------------------------------------------------------------------------------------------------------------------------|--------|--------|
| 4.7. Are other workplace reminders located throughout the facility?<br>(e.g., hand hygiene campaign screensavers badges, stickers, etc)                                                                     | 2(15)  | 1(8)   |
| <b>5. Institutional Safety Climate for Hand Hygiene</b>                                                                                                                                                     |        |        |
| 5.1. Is hand hygiene team that is dedicated to the promotion and implementation of optimal hand hygiene practice established in your facility?                                                              | 12(92) | 12(92) |
| 5.2. Does this hand hygiene team meet on a regular basis (at least annually)?                                                                                                                               | 10(75) | 7(54)  |
| 5.3. Does this hand hygiene team have dedicated time to conduct hand hygiene promotion?                                                                                                                     | 7(54)  | 10(77) |
| Are systems for designation of hand hygiene champions from all disciplines in place?                                                                                                                        | 7(54)  | 3(23)  |
| 5.4. Are systems for recognition and utilization of hand hygiene role models from all disciplines in place?                                                                                                 | 5(39)  | 1(8)   |
| 5.5. Are patients informed about the importance of hand hygiene?                                                                                                                                            | 7(54)  | 10(77) |
| 5.6. Has a formalized program of patient engagement been undertaken?                                                                                                                                        | 3(23)  | 5(39)  |
| HHSFAF - hand hygiene self-assessment framework [9], * the recommendations are from an operational research conducted during Sierra Leone national SORT IT focused on antimicrobial resistance in 2021 [13] |        |        |
